# Supplementary material
Source: HighWire-hosted journal article supplement (https://www.rcpjournals.org/highwire/filestream/10660/field_highwire_adjunct_files/0/Illingworth_Supplementary_S1.pdf)

Improving care for patients with **sepsis** and **acute kidney injury (AKI)** 2015-17

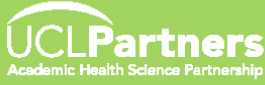

**80,000**

ESTIMATED DEATHS FROM SEPSIS AND AKI in England

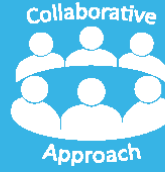

ACTIVITIES

- Improvement training
- Learning sessions
- Patient involvement
- Site visits
- Data analysis

CHANGES

- New specialist roles
- Redesigned care pathways
- Awareness campaigns
- New care packages
- Improvement tools

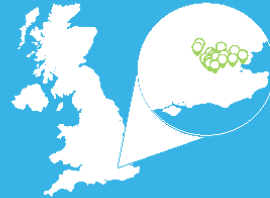

**21**

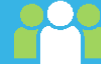

TEAMS

**13**

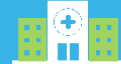

HOSPITALS

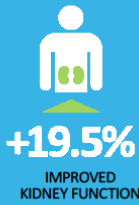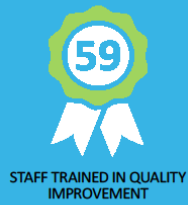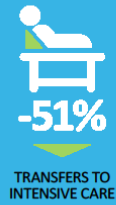

REDUCTION IN MORTALITY

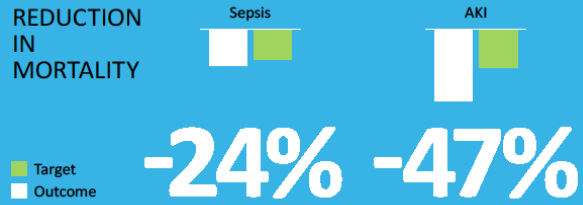

Supplement: Illingworth_Supplementary_S1.pdf [file Illingworth_Supplementary_S1.pdf]
